# Supplementary material
Source: Springer Nature journal article supplement (https://www.springermedizin.de/resource/supplementary/12992_2010_95_MOESM3_ESM.pdf/9616448)

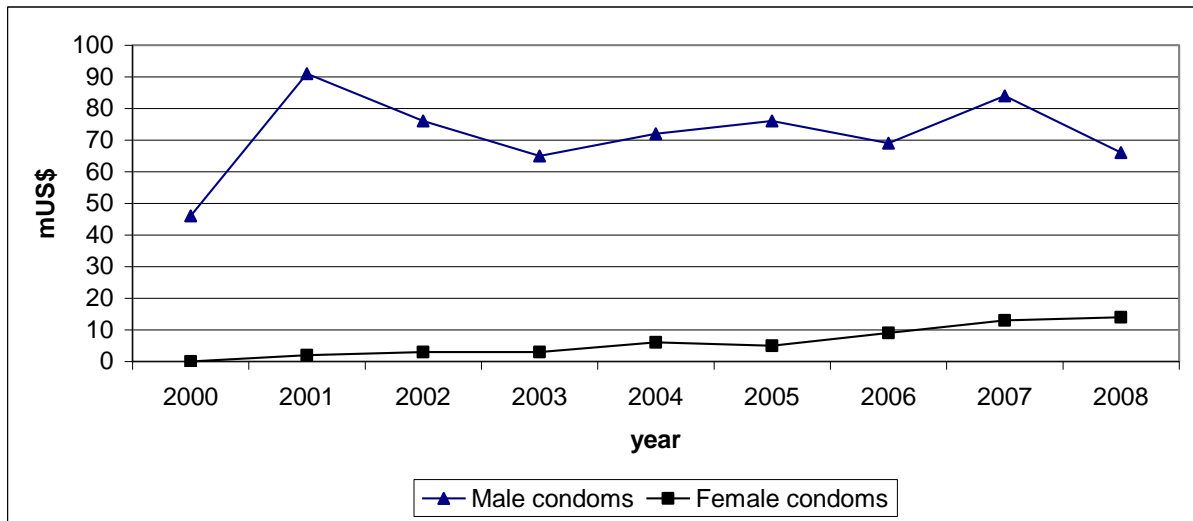

|                | 2000 | 2001 | 2002 | 2003 | 2004 | 2005 | 2006 | 2007 | 2008 |
|----------------|------|------|------|------|------|------|------|------|------|
| Male condoms   | 46   | 91   | 76   | 65   | 72   | 76   | 69   | 84   | 66   |
| Female condoms | 0    | 2    | 3    | 3    | 6    | 5    | 9    | 13   | 14   |

Supplement: MOESM3 [file 9616448]
